# Supplementary material for: Pilot Study of the Applicability, Usability, and Accuracy of the Nutricate© Online Application, a New Dietary Intake Assessment Tool for Managing Infant Cow’s Milk Allergy
Source: MDPI journal article supplement (doi:10.3390/nu15041045), 2023-02-20
Supplement: s1 [file s1]

Supplemental Table S1 : Ratio of each food categories used to merge into one food category and their correspondence in macro-micro nutrient according to food composition database.

a) Animal-protein rich food

| Food Categories   | Ratio of intake (%) | Energy (kcal/100g) | Protein (g/100g) | Calcium (mg/100g) | Iron (μg/100g) |
|-------------------|---------------------|--------------------|------------------|-------------------|----------------|
| White meat        | 17.07               | 195                | 26               | 11.8              | 710            |
| Red meat          | 33.37               | 173                | 28.1             | 9.43              | 210            |
| Fish              | 17.37               | 106                | 22.1             | 27.6              | 90             |
| Jam               | 23.02               | 117                | 20.5             | 14                | 380            |
| Egg               | 9.17                | 134                | 13.5             | 41                | 60             |
| <b>Mean Used*</b> |                     | <b>149</b>         | <b>24</b>        | <b>17</b>         | <b>300</b>     |

\*Mean used for Nutricate food composition database from Volatier et al [29]

b) Starchy

| Food Categories   | Ratio of intake (%) | Energy (kcal/100g) | Protein (g/100g) | Calcium (mg/100g) | Iron (μg/100g) |
|-------------------|---------------------|--------------------|------------------|-------------------|----------------|
| Pasta             | 61.4                | 126                | 4.38             | 17                | 430            |
| white rice        | 19.3                | 145                | 3.06             | 14                | 40             |
| wheat semolina    | 19.3                | 122                | 3.75             | 13                | 1000           |
| <b>Mean Used*</b> |                     | <b>128.9</b>       | <b>4</b>         | <b>15.7</b>       | <b>460</b>     |

\*Mean used for Nutricate food composition database from Volatier et al [29]

c) Vegetables

| Food Categories       | Ratio of<br>intake<br>(%) | Energy<br>(kcal/100g) | Protein<br>(g/100g) | Calcium<br>(mg/100g) | Iron<br>μg/100g) |
|-----------------------|---------------------------|-----------------------|---------------------|----------------------|------------------|
| Vegetable(cooked)     | 50                        | 43.5                  | 2.11                | 30.3                 | 460              |
| Tomato(not<br>cooked) | 50                        | 19.3                  | 0.86                | 8.14                 | 120              |
| <b>Mean Used*</b>     |                           | <b>31.4</b>           | <b>1.49</b>         | <b>19.2</b>          | <b>290</b>       |

\*Mean used for Nutricate food composition database from Volatier et al [29]

d) Fruits

| Food Categories   | Ratio of<br>intake<br>(%) | Energy<br>(kcal/100g) | Protein<br>(g/100g) | Calcium<br>(mg/100g) | Iron<br>μg/100g) |
|-------------------|---------------------------|-----------------------|---------------------|----------------------|------------------|
| Fruit raw         | 86.8                      | 59.5                  | 0.7                 | 14.5                 | 180              |
| Fruit coocked     | 6.6                       | 58.9                  | 0.5                 | 6.2                  | 50               |
| Fruit compote     | 6.6                       | 102                   | 0.5                 | 18                   | 130              |
| <b>Mean Used*</b> |                           | <b>62.3</b>           | <b>0.67</b>         | <b>14.2</b>          | <b>170</b>       |

\*Mean used for Nutricate food composition database from Volatier et al [29]

Supplemental Table S2 : Macronutriments repartition intake (n=30)

| Categories    | Mean ± SD<br>(%) |
|---------------|------------------|
| Proteins      | 13.5 ± 4.3       |
| Lipids        | 28.2 ± 9.5       |
| Carbohydrates | 58.3 ± 10.7      |
